report on the pellets' anecdotal success in treating diabetic infected wounds (3).

A 41-year-old male with type 1 diabetes referred to the diabetic foot clinic had radiological findings of septic arthritis and diffuse osteomyelitis (anatomic stage IV) of the right fourth metatarsal head and adjacent phalanx overlying a chronic neuropathic ulcer. He refused to undergo a ray excision of the infected bones despite the suggestion of our surgical colleagues. Local therapy with prefabricated tobramycin-impregnated CS pellets, which were inserted twice into a deep cavity beneath the small foot ulcer, was then added to supplement oral Ciprofloxacin and Clindamycin and later to Amoxicillin/clavulanic acid treatment due to drug-related diarrhea. Further radiographs of the right forefoot after 4 and 6 weeks of the above treatment revealed radiological improvement of osteomyelitis and signs of bone reconstruction in the affected bones (online appendix Fig. 1 [available at <http://care.diabetesjournals.org>]).

In a randomized study (4), high local antibiotic bioavailability from implantable beads in infected joint arthroplasties was found to be as effective as conventional parenteral antibiotic treatment. The nonadherent state of CS pellets versus bone substitutes, like polymethylmethacrylate, could be advantageous for antibiotic delivery in chronic osteomyelitis with antibiotic resistance (5). The potential role of local administration of antibiotics from CS pellets in healing and bone repair

is reported in a case series of patients with osteomyelitis (6).

In the infected nonischemic diabetic foot, the possible synergistic effect of tobramycin-impregnated CS pellets as an additional treatment to systemic antibiotics should be further investigated in clinical trials.

ELEANNA V. SALGAMI, MD, PHD<sup>1</sup>  
FRANK L. BOWLING, BSC (HONS), DPOD, MED<sup>1</sup>  
RICHARD W. WHITEHOUSE, MD, FRCP<sup>2</sup>  
ANDREW J.M. BOULTON, MD, FRCP<sup>1,3</sup>

From the <sup>1</sup>University Department of Medicine and Diabetes, Manchester Royal Infirmary, Manchester, U.K.; the <sup>2</sup>Radiology Department, Manchester Royal Infirmary, Manchester, U.K.; and the <sup>3</sup>Division of Endocrinology, Metabolism, and Diabetes, University of Miami School of Medicine, Miami, Florida.

Address correspondence to Eleanna V. Salgami, MD, PhD, c/o Professor A.J.M. Boulton, University Department of Medicine and Diabetes, Manchester Royal Infirmary, Oxford Road, M13 9WL, Manchester, U.K. E-mail: [eleanna.salgami@manchester.ac.uk](mailto:eleanna.salgami@manchester.ac.uk).

Additional information for this article can be found in an online appendix at <http://care.diabetesjournals.org>.

DOI: 10.2337/dc06-1792

© 2007 by the American Diabetes Association.

## References

1. McKee MD, Wild LM, Schemitsch EH, Waddell JP: The use of an antibiotic-impregnated, osteoconductive, bioabsorbable bone substitute in the treatment of infected long bone defects: early results of a prospective trial. *J Orthop Trauma* 16: 622–627, 2002

2. Roeder B, Van Gils CC, Maling S: Antibiotic beads in the treatment of diabetic pedal osteomyelitis. *J Foot Ankle Surg* 39: 124–130, 2000
3. Armstrong DG, Findlow AH, Oyibo SO, Boulton AJM: The use of absorbable antibiotic-impregnated calcium sulphate pellets in the management of diabetic foot infections. *Diabet Med* 18:942–943, 2001
4. Nelson CL, Evans RP, Blaha JD, Calhoun J, Henry SL, Patzakis MJ: A comparison of gentamicin-impregnated polymethylmethacrylate bead implantation to conventional parenteral antibiotic therapy in infected total hip and knee arthroplasty. *Clin Orthop Relat Res* 295:96–101, 1993
5. Webb LX, Holman J, De Araujo B, Zaccaro DJ, Gordon ES: Antibiotic resistance in staphylococci adherent to cortical bone. *J Orthop Trauma* 8:28–33, 1994
6. Gitelis S, Brebach GT: The treatment of chronic osteomyelitis with a biodegradable antibiotic-impregnated implant. *J Orthop Surg (Hong Kong)* 10:53–60, 2002

## Acute Renal Failure Following Oral Sodium Phosphate Bowel Preparation in Diabetes

Recently there is renewed interest in the association between type 2 diabetes and colorectal carcinoma (1). Some authorities have advocated more in-

**Table 1—Clinical presentation and biochemical findings of two patients with diabetes presenting with acute renal failure after sodium phosphate bowel preparation**

|                                       | Patient 1 (T.T.H.)                                             | Patient 2 (U.T.)                                   | Normal range |
|---------------------------------------|----------------------------------------------------------------|----------------------------------------------------|--------------|
| Age/sex                               | 75/male                                                        | 80/female                                          |              |
| Other medical history                 | Hypertension, microalbuminuria, paroxysmal atrial fibrillation | Hypertension, hyperlipidemia, diabetic retinopathy |              |
| Baseline creatinine                   | 80 (62–106 $\mu\text{mol/l}$ )                                 | 79 (44–80 $\mu\text{mol/l}$ )                      |              |
| Diabetes medications                  | Gliclazide, metformin                                          | Gliclazide, metformin                              |              |
| Other medications                     | Perindopril, warfarin, sotalol, nifedipine                     | Aspirin, amitriptyline, famotidine                 |              |
| Presenting complaint                  | Diarrhea, decreased consciousness                              | Hypoglycemia, diarrhea and vomiting                |              |
| Days after colonoscopy                | 4                                                              | 3                                                  |              |
| Sodium (mmol/l)                       | 133                                                            | 132                                                | 134–145      |
| Potassium (mmol/l)                    | 6.8                                                            | 4.7                                                | 3.5–5.1      |
| Urea (mmol/l)                         | 21.4                                                           | 16.8                                               | 3.4–8.9      |
| Creatinine ( $\mu\text{mol/l}$ )      | 924 (62–106)                                                   | 629 (44–80)                                        |              |
| Calcium (mmol/l)                      | 2.51                                                           | 2.16                                               | 2.15–2.55    |
| Phosphate (mmol/l)                    | 4.19                                                           | 2.04                                               | 0.82–1.40    |
| Lactate (mmol/l)                      | 17.3                                                           | 7.2                                                | 0.7–2.1      |
| Dialysis required                     | CRRT for 5 days                                                | No                                                 |              |
| Last creatinine ( $\mu\text{mol/l}$ ) | 115                                                            | 101                                                |              |

CRRT, continuous renal replacement therapy.

tensive colonoscopy screening in patients with diabetes (2). We recently managed two diabetic patients who developed acute renal failure following elective colonoscopy. The clinical presentation and biochemical parameters of these two patients are summarized in Table 1.

Both of the patients described had normal renal function at baseline, yet presented with acute renal failure within a few days following bowel preparation and colonoscopy, thus strongly implicating the bowel preparation in the development of the acute renal failure. Both patients received oral sodium phosphate (OSP) solution for bowel cleansing. OSP promotes colon evacuation by drawing large amounts of water into the colon and has been shown to be more effective and better tolerated than polyethylene glycol (PEG) solution. However, recent studies suggest that some patients given OSP are at risk of renal failure due to acute phosphate nephropathy. In a series of 31 cases of renal impairment with renal biopsies showing deposits of tubular calcium phosphate, the risk was highest among patients with preexisting renal impairment, elderly patients, and patients with hypertension or concurrent use of ACE inhibitor or angiotensin receptor blocker (ARB). In that series, 21 patients presented with acute renal failure, of which 4 had diabetes, with age ranging between 44 and 66 years. In a few patients, acute renal failure was discovered within 3 days of colonoscopy, at which time hyperphosphatemia was documented (3).

The U.S. Food and Drug Administration has recently issued an alert advising against the use of OSP products in patients with kidney disease, impaired renal function or perfusion, dehydration, or uncorrected electrolyte abnormalities. OSP should be used with caution in patients taking diuretics, ACE inhibitors, ARBs, and nonsteroidal anti-inflammatory drugs (NSAIDs) (4). In the recently published consensus document on bowel preparation before colonoscopy (5), there was no specific advice given for patients with diabetes aside from the statement that patients with diabetes have significantly poorer preparations with PEG solution than those without diabetes. Patients with diabetes often have reduced renal perfusion despite normal serum creatinine. Incipient diabetic nephropathy is marked by the presence of microalbuminuria, a powerful predictor of subsequent diabetic nephropathy. Our experience suggests that patients with diabetes and

normal renal function tests may be at increased risk of acute phosphate nephropathy after taking OSP. Clinicians should consider avoiding the use of OSP in patients with diabetes undergoing colonoscopy. Use of an osmotically balanced cleansing agent that does not cause significant shift of fluid and electrolytes, such as PEG, is likely to be a safer alternative (6). For patients receiving drugs that alter electrolyte balance, such as diuretics, ACE inhibitors, or ARBs, it may be prudent to withhold these drugs temporarily before OSP. Close monitoring of hydration status, glycemic control, and renal function is mandatory during the preparation and after colonoscopy in patients with diabetes.

RONALD C.W. MA, MRCP<sup>1</sup>  
CHUN CHUNG CHOW, FRCP<sup>1</sup>  
VINCENT T.F. YEUNG, FRCP<sup>2</sup>  
WING YEE SO, FRCP<sup>1</sup>  
ALICE P.S. KONG, FRCP<sup>1</sup>  
PETER C.Y. TONG, FRCP<sup>1</sup>  
CLIVE S. COCKRAM, FRCP<sup>1</sup>  
JULIANA C.N. CHAN, FRCP<sup>1</sup>

From the <sup>1</sup>Department of Medicine and Therapeutics, Prince of Wales Hospital, Chinese University of Hong Kong, Shatin, New Territories, Hong Kong; and the <sup>2</sup>Department of Medicine and Geriatrics, Our Lady of Maryknoll Hospital, Wong Tai Sin, Kowloon, Hong Kong.

Address correspondence to Dr. Ronald Ma, MD, Department of Medicine and Therapeutics, Prince of Wales Hospital, Chinese University of Hong Kong, Shatin, New Territories, Hong Kong. E-mail: rcwma@cuhk.edu.hk.

DOI: 10.2337/dc06-2040

© 2007 by the American Diabetes Association.

## References

1. Larsson SC, Giovannucci E, Wolk A: Diabetes and colorectal cancer incidence in the cohort of Swedish men. *Diabetes Care* 28:1805–1807, 2005
2. Bell RA, Shelton BJ, Paskett ED: Colorectal cancer screening in North Carolina: associations with diabetes mellitus and demographic and health characteristics. *Prev Med* 32:163–167, 2001
3. Markowitz GS, Stokes MB, Radhakrishnan J, D'Agati VD: Acute phosphate nephropathy following oral sodium phosphate bowel purgative: an underrecognized cause of chronic renal failure. *J Am Soc Nephrol* 16:3389–3396, 2005
4. Center for Drug Evaluation and Research, U.S. Food and Drug Administration: *Oral Sodium Phosphate (OSP) Products for Bowel Cleansing*. Washington, DC, U.S. Govt. Printing Office, 2006
5. Wexner SD, Beck DE, Baron TH, Fanelli RD, Hyman N, Shen B, Wasco KE: A con-

sensus document on bowel preparation before colonoscopy: prepared by a task force from the American Society of Colon and Rectal Surgeons (ASCRS), the American Society for Gastrointestinal Endoscopy (ASGE), and the Society of American Gastrointestinal and Endoscopic Surgeons (SAGES). *Dis Colon Rectum* 49:792–809, 2006

6. Clark LE, Dipalma JA: Safety issues regarding colonic cleansing for diagnostic and surgical procedures. *Drug Saf* 27: 1235–1242, 2004

## COMMENTS AND RESPONSES

### Is Self-Monitoring of Blood Glucose Appropriate for All Type 2 Diabetic Patients? The Fremantle Diabetes Study

Response to Davis et al.

The analysis of self-monitoring of blood glucose (SMBG) in the community-based observational Fremantle Diabetes Study (1) becomes even more interesting when combined with three other studies of SMBG in type 2 diabetes: the Italian Qualità ed Esito in Diabetologia (QuED) Project (2), analyses of the Kaiser Permanente Northern California Medical Care Program (3), and the German ROSSO Study (4).

All four studies concur that patients using SMBG are younger at diagnosis by 3–4 years (1,2,4). Patients present with higher A1C (mean +0.9%) (4). Even during continuous use of SMBG, mean A1C levels are slightly higher (difference 0.2–0.3%) (2–4) or slightly lower (–0.3%) (1) than in patients not using SMBG (mean of all four studies +0.2–0.3%).

Where, then, is the assumed beneficial impact of SMBG on blood glucose control? Though one cannot see it in cross-sectional analyses, it is evident in longitudinal studies. In the ROSSO Study, mean A1C is different at diagnosis between later SMBG users and permanent nonusers by 0.9%. In
